# Supplementary material for: TLR3 deficiency renders astrocytes permissive to herpes simplex virus infection and facilitates establishment of CNS infection in mice
Source: JCI journal article supplement (doi:10.1172/jci60893), 2012-03-19
Supplement: sd1 [file 1]

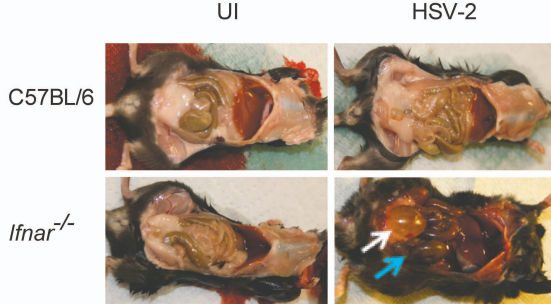

## Supplementary Figure 1

Post-mortem examination of HSV-2-infected WT versus *Ifnar*<sup>-/-</sup> mice. The *Ifnar*<sup>-/-</sup> mice exhibited urinary retention (white arrow), constipation (blue arrow) more often than control mice. The pictures represent 5 independent experiment on 6 day after intravaginal infection with HSV-2 ( $6.7 \times 10^4$  PFU). (n = 4-6 in each group per experiment).

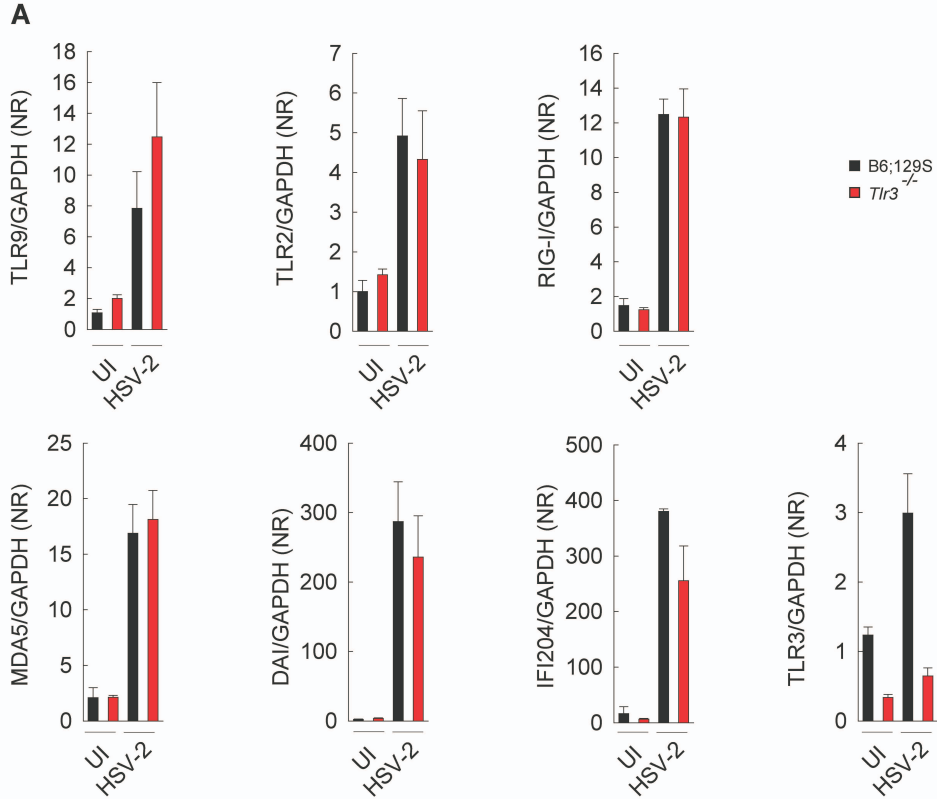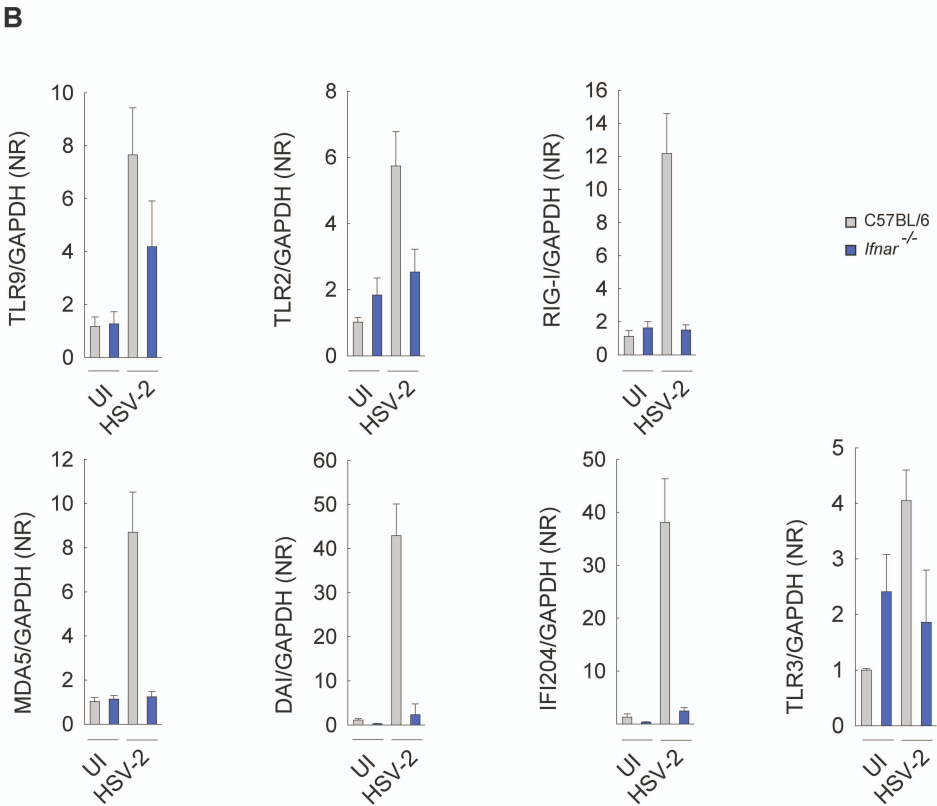

**Supplementary Figure 2**

Fold induction of PRR mRNA expression in the medulla spinalis. PRR mRNA expression in the medulla spinalis of (A) *Tlr3*<sup>-/-</sup> and (B) *Ifnar*<sup>-/-</sup> mice 6 days following vaginal HSV-2 infection ( $6.7 \times 10^4$  PFU). Data are normalized to levels in uninfected WT mice and are representative of 2-4 independent experiments (n = 5-8 mice in each group per experiment).

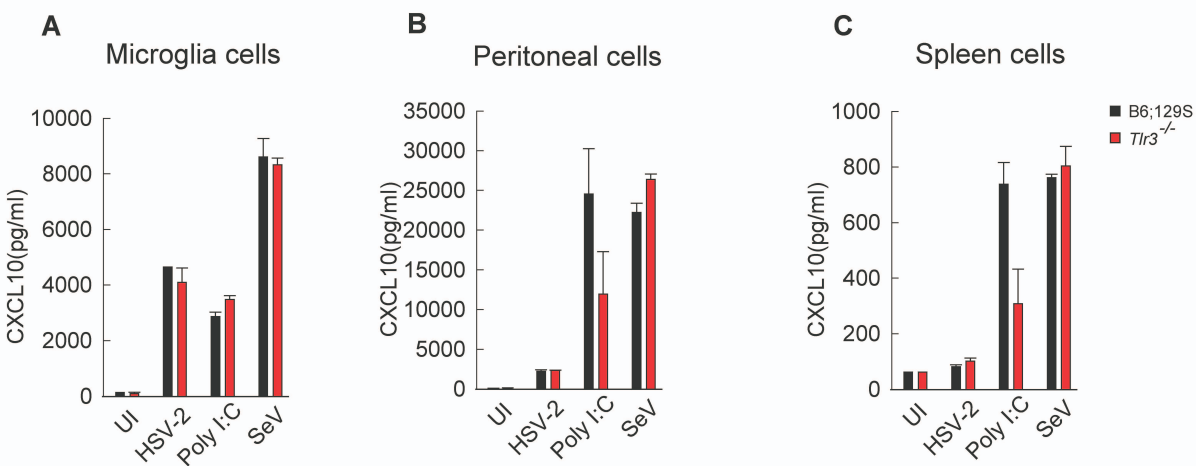

### Supplementary Figure 3

Expression of CXCL10 after HSV-2 infection in different cell types in vitro. Primary microglia, peritoneal or spleen cells from B6:129S or *Tlr3*<sup>-/-</sup> mice were treated with HSV-2 (0.1 MOI), Poly I:C (25  $\mu$ g/ml), or Sendai virus( SeV, 0.001 MOI). Twenty-four hr. later the CXCL10 protein content was measured. The data are represent 3 independent experiment (n = 3 in each group per experiment).

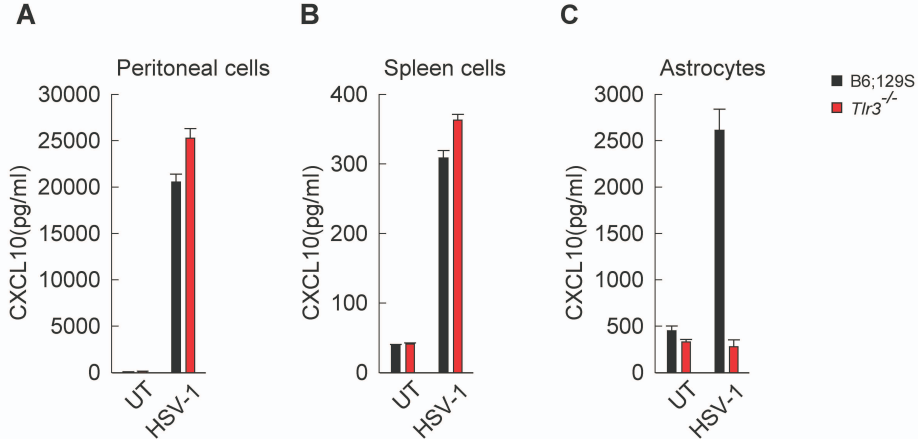

## Supplementary Figure 4

The TLR3 dependence of the response to HSV-1 in different cell types. **(A)** Peritoneal cells, **(B)** Spleen cells and **(B)** astrocytes from B6:129S or *Tlr3*<sup>-/-</sup> mice were infected with HSV-1. Supernatants were harvested 24 hr. later for measurement of CXCL10 protein levels. The data represent 3 independent experiments (n = 3 in each group per experiment).



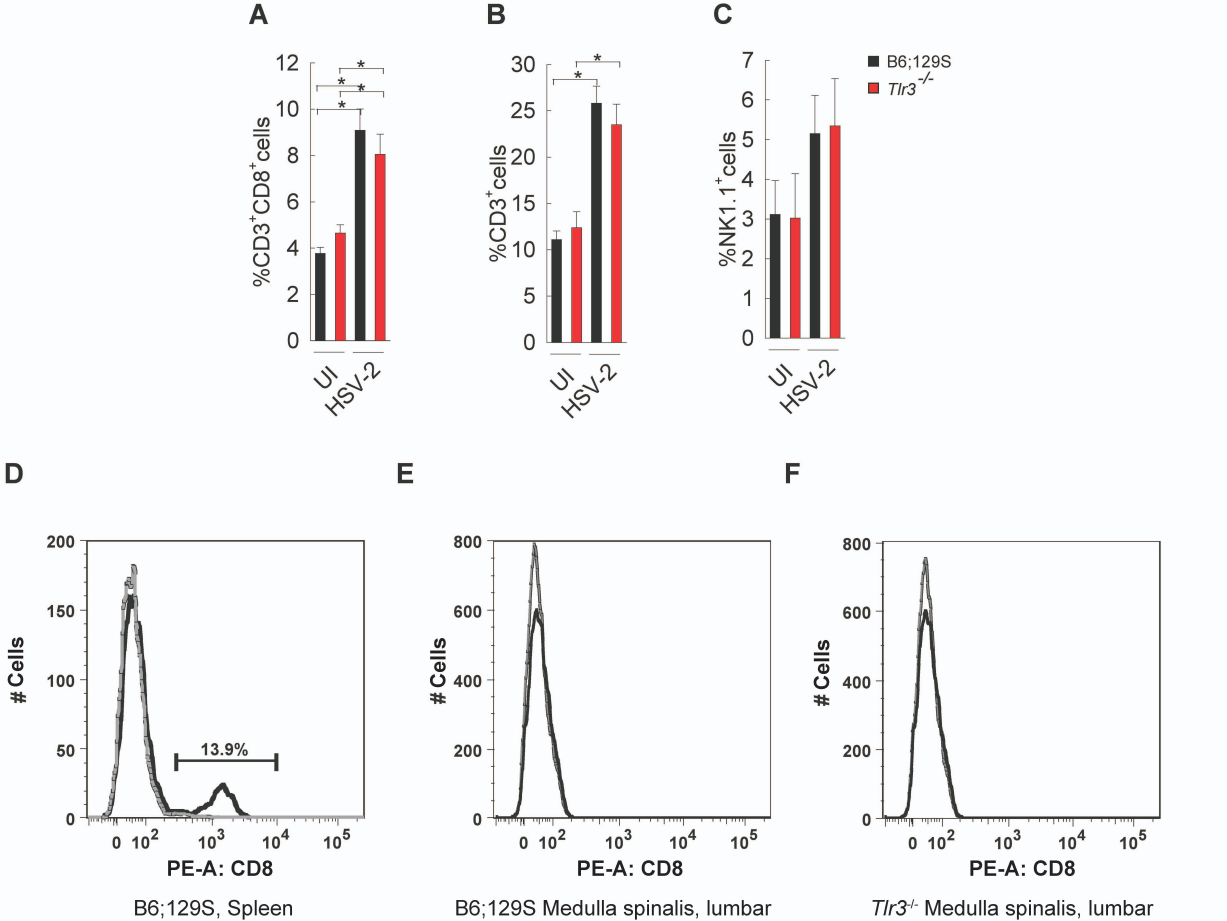

## Supplementary Figure 5

HSV-2 infection leads to elevated number of CD3<sup>+</sup> and CD8<sup>+</sup> cells in the spleen independently of TLR3, but does not induce CD8<sup>+</sup> cell accumulation in the lumbar part of the medulla spinalis. **(A)** Spleen cells from mice infected intravaginally with HSV-2 ( $6.7 \times 10^4$  PFU) for 6 days were analyzed for CD3<sup>+</sup>CD8<sup>+</sup>, CD3<sup>+</sup> or NK1.1<sup>+</sup> by flow cytometry (n = 4-6 mice in each group per experiment). **(B)** Spleen and lumbar medulla spinalis cells were harvested from mice infected intravaginally with HSV-2 for 6 days. The cells were analyzed by flow cytometry for the presence of CD8<sup>+</sup> cells in the lumbar medulla spinalis or spleen. Grey lines, blank controls (no-Ab added); black lines: specific antibody staining. Spleen cells are included as positive controls for anti-CD8 staining.

**A**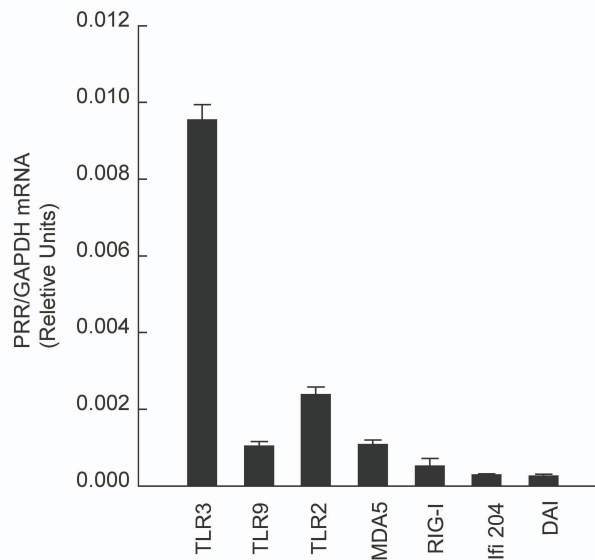**B**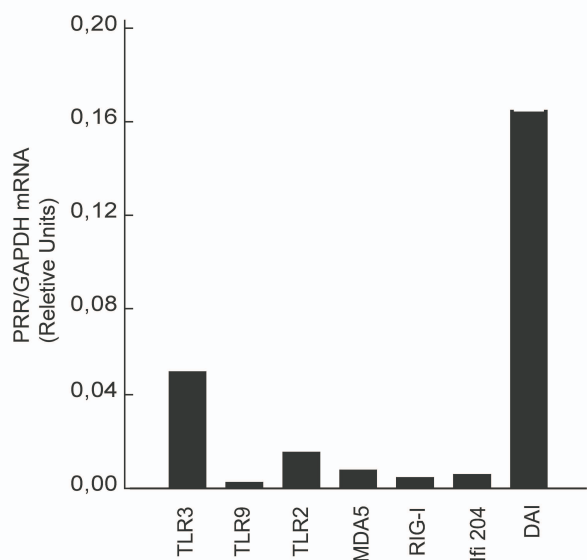

## Supplementary Figure 6

Constitutively high expression of TLR3 mRNA in the medulla spinalis and in primary astrocyte cell cultures. PRR mRNA expression in the medulla spinalis of uninfected B6;129S mice. Data shown are normalized to GAPDH levels. The data are representative of 2-4 independent experiments (n = 5-8 mice in each group per experiment). **(B)** Constitutively high expression of TLR3 and DAI mRNA in primary astrocyte cell cultures. B6;129S WT astrocyte cultures were sorted by FACS and mRNA from GFAP<sup>+</sup> population were analyzed for indicated PRRs normalized to GAPDH levels.
